# Supplementary material
Source: Research Square preprint supplement (doi:10.21203/rs.3.rs-14013/v5)
Supplement: Supplementary file 1 [file 062d39211425c2f11c869855.xlsx]

## Sheet: Sheet1
			Table S2. Expression value of DEGs from transcriptome of A. indica
			transcript	fruit	leaf	root	stem	flower
			transcript/14449	43.22	41.35	10.54	42.21	10.51
			transcript/18833	68.78	210.96	14.09	28.8	34.48
			transcript/19291	18.27	158.78	17.46	10	20.9
			transcript/17636	342.91	363.23	0	85.53	230.72
			transcript/17854	12.04	142.57	0	7.67	64.34
			transcript/16057	23.49	212.34	0	197.07	168.46
			transcript/17284	14.32	107.12	0	10.45	37.25
			transcript/16777	16.83	13.66	0	10.43	14.38
			transcript/17001	23.75	11.89	0	23.55	11.23
			transcript/16577	22.12	32.45	3.93	19.09	428.65
			transcript/16950	35.59	61.61	8.02	31.2	6.83
			transcript/17057	48.98	48.86	6.49	27.63	48.38
			transcript/16971	41.55	58.69	11.99	34.24	19.68
			transcript/16742	74.63	38.63	16.45	41.74	8.9
			transcript/16198	30.55	39.23	5.36	26.49	33.3
			transcript/17792	61.11	22.49	0	91.47	60.61
			transcript/18214	16.1	177.54	0	44.71	152.79
			transcript/19188	57.19	144.49	0	53.93	381.96
			transcript/19882	44.3	198.7	0	130.57	79.69
			transcript/19697	30.66	119.06	1.18	28.08	12.28
			transcript/19748	25.84	103.97	0	25.12	14.67
			transcript/18100	780.05	710.24	16.42	704.53	456.08
